# Supplementary material
Source: Springer Nature journal article supplement (https://www.springermedizin.de/resource/supplementary/12943_2012_1091_MOESM1_ESM.pdf/9552326)
Supplement: MOESM1 [file 9552326]

**Supplementary Table 1.** Top-ranked ucRNAs differentially expressed between tumor (n = 57) and nontumor tissue (n = 7)

| ucRNA    | Fold Change* | FDR (%) | P value  | Type‡, host, host strand                        | Overlap mRNA | Antisense to mRNA |
|----------|--------------|---------|----------|-------------------------------------------------|--------------|-------------------|
| uc.363+A | 2.22         | 0       | 6.76E-04 | n, EST, antisense                               | No           |                   |
| uc.477+  | 1.9          | 0       | 6.83E-05 | e, PLP1 exonic, sense/RAB9B intronic, antisense | Yes          |                   |
| uc.374+A | 1.81         | 0       | 2.64E-03 | p, MIPOL1 intronic, sense                       | Yes          | Yes               |
| uc.106+  | 1.81         | 1       | 5.20E-03 | p, OLA1 (PTD004) intronic, antisense            | Yes          | Yes               |
| uc.34+   | 1.78         | 0       | 4.24E-04 | e, PTBP2 exonic/intronic, sense                 | Yes          |                   |
| uc.22+   | 1.74         | 0       | 2.45E-03 | n, FAF1 intronic, antisense                     | Yes          | Yes               |
| uc.158+  | 1.71         | 1       | 4.60E-03 | n, no gene                                      | No           |                   |
| uc.404+  | 1.69         | 0       | 9.47E-04 | n, no gene                                      | No           |                   |
| uc.473+A | 1.67         | 0       | 7.48E-06 | e, NLGN3 intronic/exonic, sense                 | Yes          | Yes               |
| uc.362+A | 1.67         | 0       | 1.02E-03 | p, EST, sense                                   | No           |                   |
| uc.483+A | 1.63         | 0       | 2.05E-03 | p, TBC1D5 intronic, antisense                   | Yes          |                   |
| uc.382+A | 1.61         | 0       | 8.04E-05 | p, no gene                                      | No           |                   |
| uc.89+   | 1.56         | 0       | 1.52E-03 | e, PSMD14 intronic/exonic, sense                | Yes          |                   |
| uc.20+A  | 1.56         | 1       | 1.76E-03 | p, EST intronic, sense/antisense                | No           |                   |
| uc.215+  | 1.52         | 1       | 2.05E-03 | n, GLI3 intronic, antisense                     | Yes          | Yes               |
| uc.153+A | 1.5          | 0       | 3.38E-03 | e, TNPO1 intronic/exonic, sense                 | Yes          | Yes               |
| uc.248+  | 1.48         | 2       | 1.98E-03 | n, no gene                                      | No           |                   |
| uc.308+A | 1.47         | 4       | 3.17E-03 | p, BTRC intronic, sense                         | Yes          | Yes               |
| uc.63+   | 1.43         | 0       | 1.19E-03 | e, XPO1 intronic, antisense                     | Yes          | Yes               |
| uc.356+A | 1.41         | 5       | 2.13E-03 | e, MBNL2 intronic/exonic, sense                 | Yes          | Yes               |
| uc.106+A | 1.4          | 0       | 6.44E-04 | p, OLA1 (PTD004) intronic, antisense            | Yes          |                   |
| uc.217+A | 1.39         | 4       | 3.08E-04 | p, VSTM2A intronic/exonic, antisense            | Yes          |                   |
| uc.3+    | 1.37         | 6       | 1.17E-03 | p, FLJ20321 intronic, antisense                 | No           | Yes               |
| uc.47+   | 1.37         | 1       | 3.42E-03 | n, no gene                                      | No           |                   |
| uc.4+    | 1.35         | 5       | 4.64E-03 | n, EST intronic, antisense                      | No           |                   |
| uc.33+   | 1.3          | 3       | 4.52E-03 | e, PTBP2, sense                                 | Yes          |                   |
| uc.20+   | 1.28         | 4       | 4.96E-03 | p, EST intronic, sense/antisense                | Yes          |                   |
| uc.354+A | 1.26         | 4       | 2.68E-03 | p, EST intronic, sense                          | No           |                   |
| uc.349+  | 0.81         | 7       | 1.60E-03 | n, DACH intronic, antisense                     | Yes          | Yes               |
| uc.327+  | 0.8          | 10      | 3.46E-03 | n, ELP4 intronic, sense                         | Yes          |                   |
| uc.181+A | 0.77         | 2       | 1.46E-03 | n, RANBP17 intronic, sense                      | Yes          | Yes               |
| uc.158+A | 0.77         | 2       | 1.95E-03 | n, EST, antisense                               | No           |                   |
| uc.420+A | 0.75         | 2       | 9.37E-04 | e, DDX5 intronic/exonic, antisense              | Yes          |                   |
| uc.317+  | 0.74         | 3       | 1.75E-04 | n, MGMT intronic, sense                         | Yes          |                   |
| uc.390+  | 0.73         | 1       | 2.40E-03 | e, MAP2K5 intronic/exonic, sense                | Yes          |                   |
| uc.184+  | 0.72         | 1       | 1.86E-04 | e, CPEB4, sense                                 | Yes          |                   |
| uc.244+  | 0.7          | 1       | 8.23E-06 | n, no gene                                      | No           |                   |
| uc.389+  | 0.7          | 0       | 6.24E-05 | n, FLJ12476 intronic, sense                     | Yes          |                   |
| uc.385+  | 0.7          | 1       | 5.02E-04 | p, MEIS2 intronic, antisense                    | No           | Yes               |
| uc.252+A | 0.69         | 1       | 2.91E-04 | n, BNCS intronic, antisense                     | Yes          |                   |
| uc.282+  | 0.67         | 0       | 3.17E-04 | e, GRIN1 exonic/intronic, sense                 | Yes          |                   |
| uc.249+  | 0.67         | 0       | 1.65E-03 | n, no gene                                      | No           |                   |
| uc.1+    | 0.67         | 0       | 3.94E-03 | p, PEX14 intronic, sense                        | Yes          |                   |
| uc.234+A | 0.66         | 0       | 2.74E-05 | p, EST, sense                                   | No           |                   |

|          |      |   |          |                                     |     |     |
|----------|------|---|----------|-------------------------------------|-----|-----|
| uc.427+A | 0.65 | 0 | 3.72E-06 | p, ESTs, antisense/sense            | No  |     |
| uc.261+  | 0.64 | 0 | 8.65E-09 | n, no gene                          | No  |     |
| uc.249+  | 0.64 | 0 | 4.09E-03 | n, no gene                          | No  |     |
| uc.291+  | 0.63 | 1 | 1.93E-03 | p, C10orf11, sense                  | Yes |     |
| uc.416+A | 0.61 | 0 | 6.42E-06 | e, HOXB5 intronic/exonic, antisense | Yes |     |
| uc.346+A | 0.59 | 0 | 6.71E-04 | p, EST intronic, sense              | No  |     |
| uc.241+A | 0.57 | 0 | 4.80E-03 | n, no gene                          | No  |     |
| uc.345+A | 0.56 | 0 | 1.21E-03 | e, HOXC4 intronic/exonic, sense     | Yes | Yes |
| uc.118+A | 0.54 | 0 | 1.36E-03 | n, no gene                          | No  |     |
| uc.73+   | 0.5  | 0 | 3.87E-03 | p, BC017741 intronic, antisense     | Yes | Yes |
| uc.366+  | 0.48 | 0 | 4.58E-03 | e, STRN3 intronic/exonic, antisense | Yes | Yes |
| uc.454+A | 0.46 | 0 | 2.97E-05 | e, SLC23A1 exonic, antisense        | Yes |     |
| uc.359+A | 0.3  | 0 | 1.87E-03 | e, NOVA1 exonic, antisense          | Yes |     |

\* Fold change, reference is nontumor tissue

‡ Type is based on the original annotation of UCRs (<http://users.soe.ucsc.edu/~jill/ultra.html>) with n = nonexonic, e = exonic, and p = possibly exonic.
